# Supplementary material for: Efficacy of Non-Invasive Brain Stimulation for Treating Depression in Patients with Traumatic Brain Injury: A Meta-Analysis and Meta-Regression of Randomized Controlled Trials
Source: MDPI journal article supplement (doi:10.3390/jcm12186030), 2023-09-18
Supplement: s1 [file s1]

Table S1: Search Terms and Strings Utilized for Each Database

| Database                                       | Keywords:                                                                                                                                                                                                                                                                                  |
|------------------------------------------------|--------------------------------------------------------------------------------------------------------------------------------------------------------------------------------------------------------------------------------------------------------------------------------------------|
| PubMed                                         | (traumatic brain injur* OR TBI OR head injur* OR brain injur* OR brain trauma OR concussion OR concussive) AND (tDCS OR transcranial direct current stimulation OR non-invasive stimulation OR transcranial magnetic stimulation OR TMS OR rTMS OR brain stimulation) AND controlled trial |
| Cochrane Central Register of Controlled Trials | (traumatic brain injur* OR TBI OR head injur* OR brain injur* OR brain trauma OR concussion OR concussive) AND (tDCS OR transcranial direct current stimulation OR non-invasive stimulation OR transcranial magnetic stimulation OR TMS OR rTMS OR brain stimulation)                      |
| and Cochrane Database of Systematic Reviews    | (traumatic brain injur* OR TBI OR head injur* OR brain injur* OR brain trauma OR concussion OR concussive) AND (tDCS OR transcranial direct current stimulation OR non-invasive stimulation OR transcranial magnetic stimulation OR TMS OR rTMS OR brain stimulation)                      |
